# Supplementary material
Source: publisher figshare collection journal article supplement (https://tandf.figshare.com/articles/dataset/_/1495557)
Supplement: Supplementary file 1 [file 2]

Table S-1 Summary of analytical results for the determination of 16 PAHs in ERS-4 (µg/kg)

| No. of Labs<br>PAHs    | 01                               | 02                            | 05                            | 10                            | 07                       |      | 03                              | 04                              | 06                              | 08                           | 09                           | 11                          |      |
|------------------------|----------------------------------|-------------------------------|-------------------------------|-------------------------------|--------------------------|------|---------------------------------|---------------------------------|---------------------------------|------------------------------|------------------------------|-----------------------------|------|
|                        | Method 1<br>SE/<br>SPE/<br>GC-MS | Method 2<br>PLE/SPE/GC-<br>MS | Method 2<br>PLE/SPE/G<br>C-MS | Method 2<br>PLE/SPE/GC-<br>MS | Method 3<br>SE/<br>GC-MS | SD   | Method 4<br>SE/<br>SPE/<br>HPLC | Method 4<br>SE/<br>SPE/<br>HPLC | Method 4<br>SE/<br>SPE/<br>HPLC | Method 5<br>PLE/SPE/<br>HPLC | Method 6<br>PLE/GPC/H<br>PLC | Method7<br>PLE/GPC/U<br>PLC | SD   |
| Naphthalene            | 71.4(4.2)                        | 34.0(11.8)                    | 55.6(5.6)                     | 27.7(10.4)                    | 50.4(3.4)                | 17.5 | 74.0(4.2)                       | 46.0(7.8)                       | 56.3(4.3)                       | 52.4(3.8)                    | 35.4(10.3)                   | 58.7(9.5)                   | 13.0 |
| Acenaphthylene         | 10.5(6.5)                        | 6.76(9.3)                     | 6.46(5.7)                     | 9.84(9.4)                     | 6.20(6.6)                | 2.1  | -                               | 10.2(10.0)                      | -                               | 5.82(8.2)                    | -                            | 11.9(11.7)                  | 3.2  |
| Acenaphthene           | 14.4(4.1)                        | 10.3(5.0)                     | 10.7(5.7)                     | 12.2(8.2)                     | 10.3(4.0)                | 1.8  | 13.5(5.7)                       | 11.2(8.7)                       | 6.00(10.1)                      | 13.1(5.2)                    | 12.2(5.9)                    | 12.7(3.3)                   | 2.8  |
| Fluorene               | 31.3(1.5)                        | 20.9(2.4)                     | 21.4(2.3)                     | 19.4(6.8)                     | 27.6(8.1)                | 5.1  | 24.4(6.9)                       | 28.8(10.2)                      | 27.1(4.5)                       | 21.8(6.0)                    | 24.8(5.9)                    | 22.4(2.2)                   | 2.7  |
| Phenanthrene           | 146.0(2.8)                       | 143.9(6.7)                    | 142.6(1.0)                    | 150.8(3.9)                    | 156.7(3.2)               | 5.8  | 144.6(1.3)                      | 140.2(7.1)                      | 152.4(5.7)                      | 150.8(6.9)                   | 176.8(4.6)                   | 147.0(3.8)                  | 12.9 |
| Anthracene             | 22.6(4.2)                        | 16.1(10.0)                    | 14.3(2.3)                     | 18.8(4.6)                     | 19.6(5.7)                | 3.2  | 18.9(3.0)                       | 15.6(9.7)                       | 15.7(3.1)                       | 25.3(4.9)                    | 22.2(5.6)                    | 16.0(2.0)                   | 4.0  |
| Fluoranthene           | 174.0(3.2)                       | 152.6(4.1)                    | 155.5(7.3)                    | 165.0(2.5)                    | 163.0(3.6)               | 8.4  | 171.5(1.8)                      | 162.0(6.2)                      | 181.0(2.9)                      | 164.9(4.2)                   | 184.3(4.9)                   | 161.4(1.5)                  | 9.9  |
| Pyrene                 | 140.7(2.5)                       | 119.5(3.7)                    | 111.1(2.2)                    | 135.0(3.4)                    | 134.8(3.1)               | 12.4 | 115.2(1.5)                      | 141.7(5.7)                      | 174.2(5.3)                      | 132.1(6.3)                   | 160.8(4.9)                   | 126.3(4.1)                  | 22.1 |
| Benz[a]anthracene      | 61.6(5.3)                        | 66.7(2.9)                     | 72.7(4.1)                     | 81.5(3.8)                     | 86.4(5.6)                | 10.2 | 67.5(2.1)                       | 67.9(7.3)                       | 131.6*(4.0)                     | 96.1(3.9)                    | 93.6(3.9)                    | 81.5(2.1)                   | 13.6 |
| Chrysene               | -                                | -                             | -                             | -                             | -                        | -    | 84.2(1.6)                       | 71.7(10.9)                      | 76.0(4.4)                       | 101.3(3.0)                   | 93.8(7.5)                    | 78.4(2.3)                   | 11.3 |
| Chrysene+Triphenylene  | 88.4(1.1)                        | 81.0(4.2)                     | 77.8(12.4)                    | 116.2(3.9)                    | 92.7(4.3)                | 15.2 | -                               | -                               | -                               | -                            | -                            | -                           | -    |
| Benzo[b]fluoranthene   | 91.6(1.7)                        | 122.9(3.3)                    | 119.5(5.9)                    | 113.2(4.6)                    | 90.2(4.9)                | 15.5 | 99.3(2.2)                       | 110.0(6.3)                      | 116.5(4.4)                      | 124.6(6.8)                   | 111.8(5.3)                   | 160.0*(2.6)                 | 9.3  |
| Benzo[k]fluoranthene   | 51.6(1.7)                        | 36.9(5.7)                     | 45.8(1.0)                     | 42.5(4.8)                     | 45.1(5.5)                | 5.3  | 37.6(1.3)                       | 33.3(9.8)                       | 45.6(3.1)                       | 36.3(5.4)                    | 42.1(5.8)                    | 43.2(2.1)                   | 4.7  |
| Benzo[a]pyrene         | 75.4(1.8)                        | 75.9(4.0)                     | 83.9(3.7)                     | 82.4(5.1)                     | 76.6(5.2)                | 4.0  | 64.1(1.8)                       | 87.3(6.5)                       | 78.6(4.8)                       | 74.1(3.6)                    | 72.3(5.3)                    | 70.0(2.5)                   | 7.9  |
| Indeno[1,2,3-cd]pyrene | 71.6(3.5)                        | 75.9(6.9)                     | 82.8(3.1)                     | 72.8(6.2)                     | 85.9(4.5)                | 6.3  | 68.1(2.1)                       | 68.5(9.0)                       | 79.1(6.3)                       | 63.1(3.2)                    | 73.0(4.6)                    | 79.6(2.4)                   | 6.6  |
| Dibenz[a,h]anthracene  | 21.9(6.0)                        | 15.0(3.4)                     | 25.6(3.4)                     | 24.3(6.3)                     | 20.1(5.0)                | 4.2  | 15.1(10.1)                      | 13.1(12.5)                      | 20.5(10.5)                      | 21.6(9.0)                    | 18.2(7.6)                    | 15.4(3.8)                   | 3.3  |
| Benzo[ghi]perylene     | 85.0(3.1)                        | 80.5(8.7)                     | 84.3(8.6)                     | 82.7(7.6)                     | 81.0(3.7)                | 2.0  | 75.9(1.7)                       | 84.5(8.8)                       | 79.8(7.1)                       | 162.8*(3.2)                  | 147.3*(5.9)                  | 88.0(3.4)                   | 5.3  |

“-” No reported data; “SD” Standard deviation among laboratories; “\*” The data of removed outliers; “( )” Relative standard deviation of each laboratories (% , n=6).
