# Supplementary material
Source: publisher figshare collection journal article supplement (https://tandf.figshare.com/articles/dataset/_/1495557)
Supplement: Supplementary file 2 [file 2]

Table S-2 Summary of analytical results for the determination of 16 PAHs in ELS-1( $\mu\text{g/kg}$ )

| No. of Labs<br>PAHs    | 01                               | 02                            | 05                            | 10                            | 07                       |       | 03                              | 04                              | 06                              | 08                           | 09                           | 11                          |       |
|------------------------|----------------------------------|-------------------------------|-------------------------------|-------------------------------|--------------------------|-------|---------------------------------|---------------------------------|---------------------------------|------------------------------|------------------------------|-----------------------------|-------|
|                        | Method 1<br>SE/<br>SPE/<br>GC-MS | Method 2<br>PLE/SPE/GC-<br>MS | Method 2<br>PLE/SPE/G<br>C-MS | Method 2<br>PLE/SPE/G<br>C-MS | Method 3<br>SE/<br>GC-MS | SD    | Method 4<br>SE/<br>SPE/<br>HPLC | Method 4<br>SE/<br>SPE/<br>HPLC | Method 4<br>SE/<br>SPE/<br>HPLC | Method 5<br>PLE/SPE/H<br>PLC | Method 6<br>PLE/GPC/H<br>PLC | Method7<br>PLE/GPC/UP<br>LC | SD    |
| Naphthalene            | 83.7(8.9)                        | 53.1(13.9)                    | 51.8(5.6)                     | 58.4(6.5)                     | 45.6(7.1)                | 14.8  | 59.9(5.9)                       | 45.3(14.7)                      | 68.5(9.1)                       | 57.1(1.3)                    | 61.4(7.1)                    | 73.7(10.3)                  | 9.8   |
| Acenaphthylene         | 74.0(3.3)                        | 15.5(7.4)                     | 31.4(7.3)                     | 25.1(3.0)                     | 29.1(5.1)                | 22.6  | -                               | 87.6(13.4)                      | -                               | 12.3(8.4)                    | -                            | 16.3(12.7)                  | 42.4  |
| Acenaphthene           | 192.0(2.3)                       | 104.3(3.4)                    | 136.8(4.1)                    | 136.3(5.9)                    | 154.2(5.5)               | 32.0  | 180.3(3.8)                      | 130.7(10.4)                     | 100.3(2.5)                      | 158.4(1.4)                   | 165.7(7.1)                   | 157.0(6.6)                  | 28.7  |
| Fluorene               | 322.2(3.3)                       | 208.7(2.6)                    | 261.0(4.2)                    | 258.3(6.3)                    | 257.7(5.3)               | 40.3  | 293.0(6.2)                      | 277.5(7.9)                      | 249.9(2.0)                      | 305.0(2.4)                   | 300.7(7.0)                   | 261.0(7.0)                  | 22.3  |
| Phenanthrene           | 2500(3.3)                        | 2122(8.8)                     | 2564(4.6)                     | 2196(3.4)                     | 2810(2.6)                | 281.3 | 2518(2.2)                       | 2435(7.5)                       | 2314(3.3)                       | 2778(1.6)                    | 3239(3.5)                    | 2484(6.8)                   | 336.0 |
| Anthracene             | 332.4(2.9)                       | 260.1(2.8)                    | 265.4(4.9)                    | 287.4(4.2)                    | 341.2(3.1)               | 37.6  | 342.6(1.5)                      | 351.5(4.9)                      | 263.2(3.2)                      | 336.8(5.2)                   | 376.5(3.1)                   | 287.3(7.5)                  | 42.5  |
| Fluoranthene           | 2848(2.8)                        | 2457(1.5)                     | 2851(5.4)                     | 2701(4.5)                     | 2782(3.9)                | 163.3 | 2785(3.1)                       | 2795(5.0)                       | 2885(3.2)                       | 2798(1.0)                    | 3272(3.0)                    | 2679(4.9)                   | 208.0 |
| Pyrene                 | 1977(1.7)                        | 1779(5.1)                     | 1850(7.8)                     | 1882(1.4)                     | 1880(5.2)                | 71.3  | 1929(2.7)                       | 1832(5.9)                       | 2221(2.0)                       | 1888(0.6)                    | 2268(3.8)                    | 1829(5.2)                   | 197.8 |
| Benz[a]anthracene      | 865.8(2.0)                       | 725.7(7.5)                    | 817.3(3.1)                    | 824.6(4.3)                    | 789.0(4.1)               | 51.9  | 801.4(2.0)                      | 762.8(8.0)                      | 1103*(1.3)                      | 649.6(1.3)                   | 855.2(3.2)                   | 789.4(5.3)                  | 76.1  |
| Chrysene               | -                                | -                             | -                             | -                             | -                        | -     | 880.3(3.1)                      | 859.3(3.0)                      | 800.4(2.0)                      | 756.7(2.7)                   | 795.9(1.9)                   | 696.3(3.3)                  | 67.2  |
| Chrysene+Triphenylene  | 771.7(2.2)                       | 702.1(4.2)                    | 868.1(3.2)                    | 861.7(1.4)                    | 748.2(4.2)               | 72.5  | -                               | -                               | -                               | -                            | -                            | -                           | -     |
| Benzo[b]fluoranthene   | 745.1(2.5)                       | 750.4(5.8)                    | 741.0(2.7)                    | 801.3(4.8)                    | 603.7(5.2)               | 73.8  | 673.3(2.2)                      | 625.8(5.3)                      | 790.9(2.2)                      | 674.3(2.0)                   | 770.6(3.4)                   | 999.0*(3.1)                 | 70.5  |
| Benzo[k]fluoranthene   | 434.0(3.6)                       | 323.2(2.9)                    | 433.0(6.9)                    | 380.3(4.2)                    | 370.0(4.8)               | 46.7  | 379.2(2.2)                      | 351.8(6.9)                      | 441.5(1.3)                      | 364.9(1.7)                   | 424.0(3.5)                   | 381.5(3.0)                  | 34.9  |
| Benzo[a]pyrene         | 577.7(3.5)                       | 577.0(6.8)                    | 645.7(6.7)                    | 642.5(3.5)                    | 550.7(4.7)               | 42.8  | 574.4(2.4)                      | 687.8(5.4)                      | 739.6(3.5)                      | 592.5(1.9)                   | 604.2(3.9)                   | 643.8(6.0)                  | 63.3  |
| Indeno[1,2,3-cd]pyrene | 554.5(2.5)                       | 590.7(5.6)                    | 662.5(4.2)                    | 546.8(3.9)                    | 526.8(4.1)               | 53.5  | 576.9(5.2)                      | 496.2(3.6)                      | 733.5(3.7)                      | 538.2(2.0)                   | 623.8(3.1)                   | 565.1(4.4)                  | 82.5  |
| Dibenz[a,h]anthracene  | 134.3(4.1)                       | 93.3(6.7)                     | 120.0(9.8)                    | 122.0(7.3)                    | 45.7(4.7)                | 35.4  | 103.4(9.6)                      | 93.8(4.1)                       | 160.8(2.5)                      | 132.5(2.6)                   | 119.8(4.8)                   | 122.3(4.6)                  | 23.5  |
| Benzo[ghi]perylene     | 537.7(3.2)                       | 553.3(6.1)                    | 545.9(2.0)                    | 564.8(3.6)                    | 538.3(4.0)               | 11.3  | 503.1(2.1)                      | 545.3(5.8)                      | 689.3*(1.6)                     | 575.5(6.5)                   | 804.7*(2.5)                  | 585.3(5.4)                  | 37.0  |

“-” No reported data; “SD” Standard deviation among laboratories; “\*” The data of removed outliers; “( )” Relative standard deviation of each laboratories (% ,  $n=6$ ).
